# Supplementary material
Source: HighWire-hosted journal article supplement (https://bmjopen.bmj.com/content/15/1/e087346)
Supplement: inline-supplementary-material-2 [file inline-supplementary-material-2.pdf]

**A survey on cybervictimization and non-suicidal self-injury  
among college students**

1.What is your gender?

Male

Female

2.What is your ethnicity?

Han

Other

3.What is your age?

\_\_\_\_\_ years

4. Are you a left-behind child?

Yes

No

5.Are you the only child of your parents?

Yes

No

6. How would you assess your family's economic condition in comparison to your classmates and friends?

Poor

Average

Good

7. In the past month, how often have you intentionally engaged in self-injurious behaviors without suicidal intent? (Examples include: cutting, biting, burning, carving, scratching, hitting or banging yourself, or rubbing your skin against rough surfaces.)?

0 times

1 time

2 times

3 times or more

8. In the past six months, how often have you intentionally engaged in self-injurious behaviors without suicidal intent? (Examples include: cutting, biting, burning, carving, scratching, hitting or banging yourself, or rubbing your skin against rough surfaces.)?

0 times

1 time

2 times

3 times or more

9. In the past twelve months, how often have you intentionally engaged in self-injurious behaviors without suicidal intent? (Examples include: cutting, biting, burning, carving, scratching, hitting or banging yourself, or rubbing your skin against rough surfaces.)?

0 times

1 time

2 times

3 times or more

10. Had something embarrassing or mean posted or reposted about you

Never

Rarely

Sometimes

Often

Always

11. Received a hurtful message from someone online

Never

Rarely

Sometimes

Often

Always

12. Had an embarrassing photo or video of you posted or reposted online

Never

Rarely

Sometimes

Often

Always

13. Had hurtful comments made about a photo or video of you

Never

Rarely

Sometimes

Often

Always

14. Had something personal posted online that you did not want others to know

Never

Rarely

Sometimes

Often

Always

15. Had gossip or rumors spread about you

Never

Rarely

Sometimes

Often

Always

16. Others deliberately or inadvertently avoid me when playfully teasing or joking

Never

Rarely

Sometimes

Often

Always

17. I become the target of malicious teasing by others

Never

Rarely

Sometimes

Often

Always

18. Others do not share their feelings or experiences with me

Never

Rarely

Sometimes

Often

Always

19. Someone speak negatively about me behind my back, affecting others' perceptions of me

Never

Rarely

Sometimes

Often

Always

20. My mistakes are met with ridicule or harsh criticism

Never

Rarely

Sometimes

Often

Always

21. I am frequently reported for my errors or oversights

Never

Rarely

Sometimes

Often

Always

22. When I join group conversations, the discussion tends to go silent

Never

Rarely

Sometimes

Often

Always

23. When I might embarrass myself or make a mistake, others seem to wait for a spectacle

Never

Rarely

Sometimes

Often

Always

24. Others mock my shortcomings, causing me emotional pain

Never

Rarely

Sometimes

Often

Always

25. I receive unfriendly glances for no apparent reason

Never

Rarely

Sometimes

Often

Always

26. When I am feeling down, I do not receive consolation or support from others

Never

Rarely

Sometimes

Often

Always

27. Even when I strive to improve relationships, I do not receive positive responses.

Never

Rarely

Sometimes

Often

Always

28. Despite being acquainted, others do not initiate greetings with me.

Never

Rarely

Sometimes

Often

Always

29. Others respond to my inquiries or requests with impatience and indifference.

Never

Rarely

Sometimes

Often

Always

30. My attempts to engage in conversation rarely elicit enthusiastic responses.

Never

Rarely

Sometimes

Often

Always

31. Others seldom notice me and are generally unaware of my circumstances.

Never

Rarely

Sometimes

Often

Always

32. Others intentionally or unintentionally maintain physical distance from me.

Never

Rarely

Sometimes

Often

Always

33. During conversations, regardless of the topic I introduce, others do not engage.

Never

Rarely

Sometimes

Often

Always

34. My interactions with others seem to lack depth and continuity.

Never

Rarely

Sometimes

Often

Always

35. I have difficulty making sense out of my feelings

Almost Never

Rarely

Sometimes

Often

Almost Always

36. I am confused about how I feel

Almost Never

Rarely

Sometimes

Often

Almost Always

37. When I'm upset, I have difficulty getting work done

Almost Never

Rarely

Sometimes

Often

38. When I'm upset, I become out of control

Almost Never

Rarely

Sometimes

Often

Almost Always

39. When I'm upset, I believe that I will remain that way for a long time

Almost Never  
Rarely  
Sometimes  
Often  
Almost Always  
40. When I'm upset, I believe that I'll end up feeling very depressed  
Almost Never  
Rarely  
Sometimes  
Often  
Almost Always  
41. When I'm upset, I have difficulty focusing on other things  
Almost Never  
Rarely  
Sometimes  
Often  
Almost Always  
42. When I'm upset, I feel out of control  
Almost Never  
Rarely  
Sometimes  
Often  
Almost Always  
43. When I'm upset, I feel ashamed with myself for feeling that way.  
Almost Never  
Rarely  
Sometimes  
Often  
Almost Always  
44. When I'm upset, I feel like I am weak  
Almost Never  
Rarely  
Sometimes  
Often  
Almost Always  
45. When I'm upset, I have difficulty controlling my behaviors  
Almost Never  
Rarely  
Sometimes  
Often  
Almost Always  
46. When I'm upset, I believe that there is nothing I can do to make myself feel better  
Almost Never  
Rarely

Sometimes  
Often  
Almost Always  
47. When I'm upset, I become irritated with myself for feeling that way  
Almost Never  
Rarely  
Sometimes  
Often  
Almost Always  
48. When I'm upset, I start to feel very bad about myself  
Almost Never  
Rarely  
Sometimes  
Often  
Almost Always  
49. When I'm upset, I have difficulty thinking about anything else  
Almost Never  
Rarely  
Sometimes  
Often  
Almost Always  
50. When I'm upset, my emotions feel overwhelming  
Almost Never  
Rarely  
Sometimes  
Often  
Almost Always
